# Supplementary material for: A Cinnamate 4-HYDROXYLASE1 from Safflower Promotes Flavonoids Accumulation and Stimulates Antioxidant Defense System in Arabidopsis
Source: MDPI journal article supplement (doi:10.3390/ijms24065393), 2023-03-11
Supplement: s1 [file s1]

# Supplementary Figures and Tables

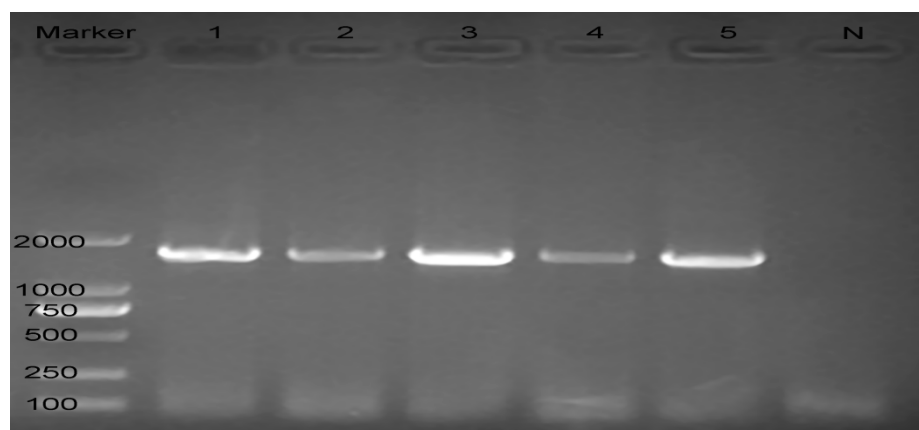

**Figure S1.**The PCR detection results of CtC41 gene cloning.

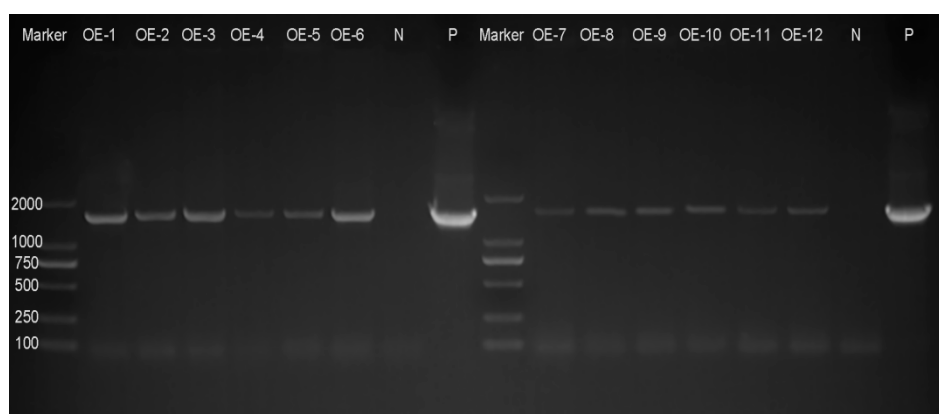

**Figure S2.**The PCR detection results of overexpressed lines.

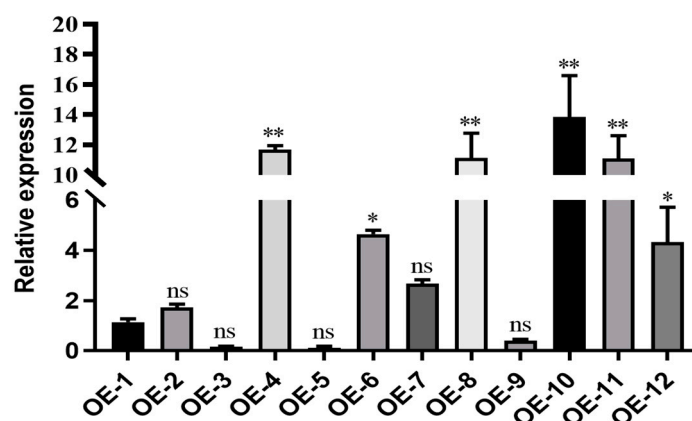

**Figure S3.** The qRT-PCR results of two high overexpressed lines.

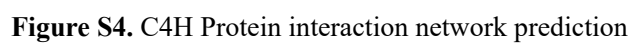

**Supplementary Table S1**

|                                        |    |
|----------------------------------------|----|
| <i>Cynara cardunculus</i>              | Cc |
| <i>Zinnia elegans</i>                  | Ze |
| <i>Vigna radiata</i>                   | Vr |
| <i>Verbena x hybrida</i>               | Vh |
| <i>Vaccinium corymbosum</i>            | Vc |
| <i>Tripterygium wilfordii</i>          | Tw |
| <i>Tarenaya hassleriana</i>            | Th |
| <i>Tanacetum cinerariifolium</i>       | Tc |
| <i>Salvia splendens</i>                | Ss |
| <i>Sesamum indicum</i>                 | Si |
| <i>Rubus sp</i>                        | Ru |
| <i>Rubus occidentalis</i>              | Ro |
| <i>Rubus coreanus</i>                  | Rc |
| <i>Pyrus sinkiangensis</i>             | Ps |
| <i>Platycodon grandiflorus</i>         | Pg |
| <i>Perilla frutescens</i>              | Pf |
| <i>Pyrus x bretschneideri</i>          | Pb |
| <i>Prosopis alba</i>                   | Pa |
| <i>Ocimum tenuiflorum</i>              | Ot |
| <i>Osmanthus fragrans</i>              | Of |
| <i>Olea europaea var</i>               | Oe |
| <i>Ocimum basilicum</i>                | Ob |
| <i>Nelumbo nucifera</i>                | Nn |
| <i>Malus hybrid cultivar Royalty</i>   | MR |
| <i>Mentha x piperita</i>               | Mp |
| <i>Malus domestica</i>                 | Md |
| <i>Momordica charantia</i>             | Mc |
| <i>Lactuca sativa</i>                  | Ls |
| <i>Lycoris radiata</i>                 | Lr |
| <i>Leucaena leucocephala</i>           | Ll |
| <i>Lotus japonicus</i>                 | Lj |
| <i>Juglans regia</i>                   | Jr |
| <i>Isatis tinctoria</i>                | It |
| <i>Ipomoea purpurea</i>                | Ip |
| <i>Ipomoea nil</i>                     | In |
| <i>Ipomoea batatas cultivar purple</i> | Ib |
| <i>Hibiscus syriacus</i>               | Hs |
| <i>Hibiscus cannabinus</i>             | Hc |
| <i>Helianthus annuus</i>               | Ha |
| <i>Fragaria vesca subsp</i>            | Fv |
| <i>Echinacea purpurea</i>              | Ep |
| <i>Euphorbia maculata</i>              | Em |
| <i>Erythranthe guttatus</i>            | Eg |
| <i>Erigeron canadensis</i>             | Ec |
| <i>Echinacea angustifolia</i>          | Ea |
| <i>Camellia sinensis</i>               | Cs |

|                              |    |
|------------------------------|----|
| <i>Cucurbita pepo subsp</i>  | Cp |
| <i>Cucurbita moschata</i>    | Cm |
| <i>Cirsium japonicum</i>     | Cj |
| <i>Cichorium intybus</i>     | Ci |
| <i>Citrus clementina</i>     | Cc |
| <i>Chrysanthemum boreale</i> | Cb |
| <i>Barnadesia spinosa</i>    | Bs |
| <i>Brassica rapa subsp</i>   | Br |
| <i>Aquilaria sinensis</i>    | As |
| <i>Agastache rugosa</i>      | Ar |
| <i>Abrus precatorius</i>     | Ap |
| <i>Asparagus officinalis</i> | Ao |
| <i>Arachis ipaensis</i>      | Ai |
| <i>Arachis hypogaea</i>      | Ah |
| <i>Arachis duranensis</i>    | Ad |

**Supplementary Table S2. Primers used in the paper.**

| Primer               | Sequence (5'-3')                               |
|----------------------|------------------------------------------------|
| CtC4H1-F             | ATGGATCTTCTCCTCTTGGAG                          |
| CtC4H1-R             | TCACAACGATCTTGGTTTCGC                          |
| pCAMBIA1300-CtC4H1-F | ggacgagctcggtagccgggATGGATCTTCTCCTCTTGG        |
| pCAMBIA1300-CtC4H1-R | ccatgtcgactctagaggatcCAACGATCTTGGTTTCGC        |
| pGBKT7-CtC4H1-F      | atggccatggaggccgaattcATGGATCTTCTCCTCTTGG       |
| pGBKT7-CtC4H1-R      | ccgctgcaggtcgacggatccCAACGATCTTGGTTTCGC        |
| Pxy106-CtC4H1-F      | atcgaggacgccggcgatccATGGATCTTCTCCTCTTGG        |
| Pxy106-CtC4H1-R      | acgaaagctctgcaggtcgacCAACGATCTTGGTTTCGC        |
| pCAMBIA1300-CtPAL1-F | ggacgagctcggtagccgggATGGATCAATACATGAGCAATGGAC  |
| pCAMBIA1300-CtPAL1-R | ccatgtcgactctagaggatcTGAAGAAATAGGAAGTGGGGTCCCA |
| pGADT7-CtPAL1-F      | tatggccatggaggccagtATGGATCAATACATGAGCAATGGAC   |
| pGADT7-CtPAL1-R      | tacgggtgggcccaccttaTGAAGAAATAGGAAGTGGGGTCC     |
| pxy104-CtPAL1-F      | ttacaattacaggtaccgggATGGATCAATACATGAGC         |
| pxy104-CtPAL1-R      | gccaccgccgtcgactctagaTGAAGAAATAGGAAGTGG        |

**Supplementary Table S3. Primers sequence used for qRT-PCR (5'-3').**

| Primer        | Sequence (5'-3')       |
|---------------|------------------------|
| qPCR-CtC4H1-F | GCGTTTGGTGCAGAATTTTCG  |
| qPCR-CtC4H1-R | TCGCAACAATGGTGGGAATGG  |
| qPCR-CtC4H2-F | TGGTGCAGAATTTTCGAGCTG  |
| qPCR-CtC4H2-R | AACGACCGTGGTTTAGCAAC   |
| 18srRNA-F     | GAGAAACGGCTACCACATCCAA |
| 18srRNA-R     | TCGTTTGAGCCCGGTATTGTTA |
| qRT-AtPAL-F   | GCAAATCCTTTTCGCAGAAGC  |
| qRT-AtPAL-R   | GTCGACCGTCAAGAATGTGGTC |
| qRT-At4CL-F   | CGCAAACCCTTTCTTCACTC   |
| qRT-At4CL-R   | ACTCCGTCGTCGTTTTGAAG   |
| qRT-AtCHS-F   | AGAAGTTCAAGCGCATGTGC   |
| qRT-AtCHS-R   | AGAGAAGGAGCCATGTAAGCAC |
| qRT-AtCHI-F   | CGGTATGCAACATGCCGAA    |
| qRT-AtCHI-R   | AAGATACTTGGCAATGGTTGCG |
| qRT-AtF3H-F   | TCAGATCGTTGAGGCTTGTG   |
| qRT-AtF3H-R   | ATGTCGAAACGGAGCTTGTC   |
| qRT-AtF3'H-F  | GAGGAGCGTGACCACAA      |
| qRT-AtF3'H-R  | GACTGAGCTAGCCGGAGAGTC  |
| qRT-AtFLS-F   | TGCAGTGCATGTGAAGAAGC   |
| qRT-AtFLS-R   | CGAGACCTTCTTTCAACGCATC |
| qRT-AtDFR-F   | ATTTGCCAAACGCCAAGACG   |
| qRT-AtDFR-R   | TGTTGCCACGTGGAAAACAC   |
| qRT-AtANS-F   | TGCAAACGATCAAGCCACTG   |
| qRT-AtANS-R   | TTGTCCACTCGCGTTGTTAG   |

**Supplementary Table S4. Go enrichment of differentially expressed genes identified from safflower.**

| Category | GOID       | Go term                                       | pvalue      | padj        |
|----------|------------|-----------------------------------------------|-------------|-------------|
| BP       | GO:0065007 | Biological regulation                         | 1.75493E-05 | 0.001175803 |
| BP       | GO:0071840 | cellular component organization or biogenesis | 8.60675E-05 | 0.003844349 |
| BP       | GO:0009987 | cellular process                              | 0.000137249 | 0.034979675 |
| BP       | GO:0032502 | developmental process                         | 0.000178014 | 0.034979675 |
| BP       | GO:0051179 | localization                                  | 4.10665E-05 | 0.015257606 |
| BP       | GO:0008152 | metabolic process                             | 8.90522E-05 | 0.015257606 |
| BP       | GO:0032501 | multicellular organismal process              | 8.90522E-05 | 0.015257606 |
| BP       | GO:0050896 | Responses to stimuli                          | 0.000179397 | 0.022071832 |
| BP       | GO:0048511 | rhythmic process                              | 0.000214707 | 0.022071832 |
| BP       | GO:0023052 | signaling                                     | 0.00010446  | 0.035934288 |
| CC       | GO:0005623 | cell                                          | 0.037581225 | 0.037678498 |
| CC       | GO:0034330 | cell junction                                 | 0.03789663  | 0.011997768 |
| CC       | GO:0005576 | extracellular region                          | 0.03789663  | 0.067849842 |
| CC       | GO:0016020 | membrane                                      | 0.04947279  | 0.01776785  |
| CC       | GO:0044425 | membrane part                                 | 0.049912644 | 0.049776785 |
| CC       | GO:0031974 | membrane-enclosed lumen                       | 0.049912644 | 0.027856072 |
| CC       | GO:0043226 | organelle                                     | 0.000543309 | 0.010269344 |
| CC       | GO:0044422 | organelle part                                | 0.000805316 | 0.051850717 |
| CC       | GO:0065003 | protein-containing complex                    | 0.001039723 | 0.030265212 |
| CC       | GO:0099080 | supramolecular complex                        | 0.003611977 | 0.040123684 |
| CC       | GO:0055044 | symplast                                      | 0.000417837 | 0.02043221  |
| CC       | GO:0019012 | virion                                        | 0.004675681 | 0.040150883 |
| CC       | GO:0044423 | virion part                                   | 0.009816576 | 0.029977678 |
| MF       | GO:0016209 | antioxidant activity                          | 0.008432368 | 0.010491599 |
| MF       | GO:0005488 | binding                                       | 0.00061913  | 0.002419217 |
| MF       | GO:0003824 | catalytic activity                            | 8.82592E-05 | 0.020559605 |
| MF       | GO:0098772 | molecular function regulator                  | 0.00778394  | 0.021275246 |
| MF       | GO:0060089 | molecular transducer activity                 | 8.39399E-05 | 0.044259895 |
| MF       | GO:0005198 | structural molecule activity                  | 0.003939939 | 0.898062569 |
| MF       | GO:0140110 | transcription regulator activity              | 0.02994321  | 0.047703835 |
| MF       | GO:0005215 | transporter activity                          | 0.026568319 | 0.002289936 |
